# Supplementary material for: Enhancement of Binding Kinetics on Affinity Substrates Using Asymmetric Electroosmotic Flow on a Sinusoidal Bipolar Electrode
Source: MDPI journal article supplement (doi:10.3390/mi13020207), 2022-01-28
Supplement: s1 [file s1]

# Enhancement of binding kinetics on affinity substrates using asymmetric electroosmotic flow on a sinusoidal bipolar electrode.

Yupan Wu<sup>123</sup>, Bowen Hu<sup>1</sup>, Xun Ma<sup>1</sup>, Yucheng Wang<sup>1</sup>, Wei Li<sup>1</sup> and Shaoxi Wang<sup>\*1</sup>

<sup>1</sup> School of Microelectronics, Northwestern Polytechnical University, Xi'an, PR China 710072, Email:

<sup>2</sup> Research & Development Institute of Northwestern Polytechnical University in Shenzhen, PR China 518000

<sup>3</sup> Yangtze River Delta Research Institute of NPU, Taicang, PR China 215400

\* Correspondence: shxwang@nwpu.edu.cn

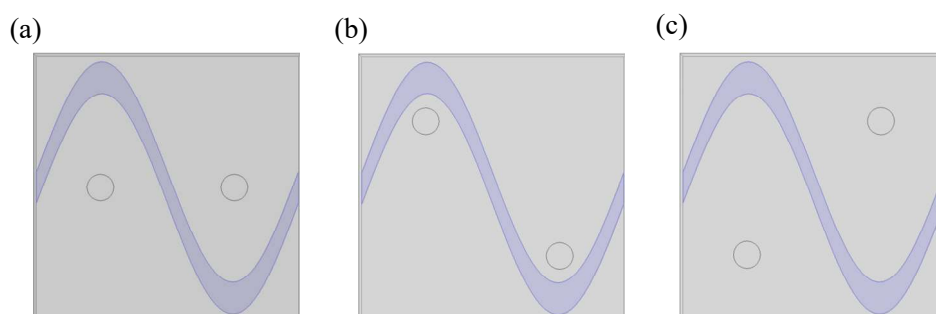

**Figure S1.** Three microfluidic chips with different positions of reaction areas. The immune reaction takes place in the circular area and the purple area is the sinusoidal electrode.

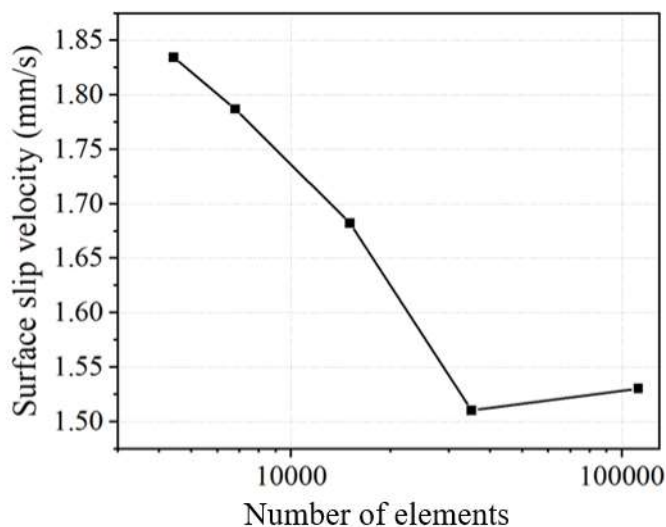

**Figure S2.** Surface slip velocity versus grid elements.

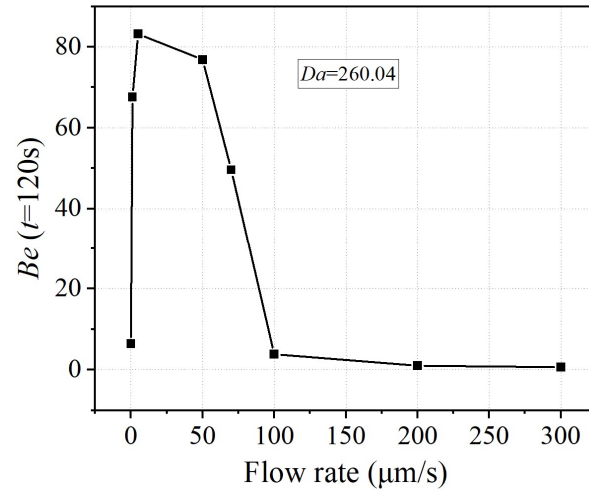

**Figure S3.** The plot of binding efficiency versus different inlet flow rate under  $Da=260.04$ ,  $V_i=19V$  and  $f=80Hz$  at  $t=120s$ .
